# Supplementary material for: Metabolic molecular markers of the tidal clock in the marine crustacean Eurydice pulchra
Source: PubMed Central journal article supplement (PMC4406942; doi:10.1016/j.cub.2015.02.052), 2015-04-20

Supplemental Information: Metabolic molecular markers of the tidal clock in the marine crustacean *Eurydice pulchra*

Figure S1.

Circatidal rhythms of swimming activity and PRX overoxidation in *Eurydice pulchra*.

A. Section of representative actogram depicting mean spontaneous swimming activity of *E. pulchra* collected October 2012 (n= 15, period= 12.21±0.04h) HW: predicted high water on home beach. B. Representative western blot of overoxidised peroxiredoxin and loading control. C. Relative intensity of overoxidised peroxiredoxin signal from *E. pulchra* heads (Group data, mean±SEM, n=3 collections, 10 heads per sample) (ANOVA time effect p<0.002; cosinor period =12.8±0.9h). Arrows indicate peak swimming activity in parallel sample. D. Peroxiredoxin overoxidation signal in control *E. pulchra* heads enhanced by pre-treatment with hydrogen peroxide

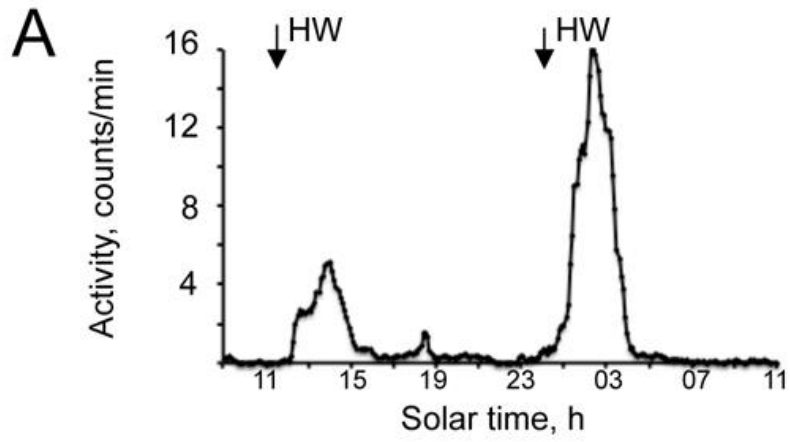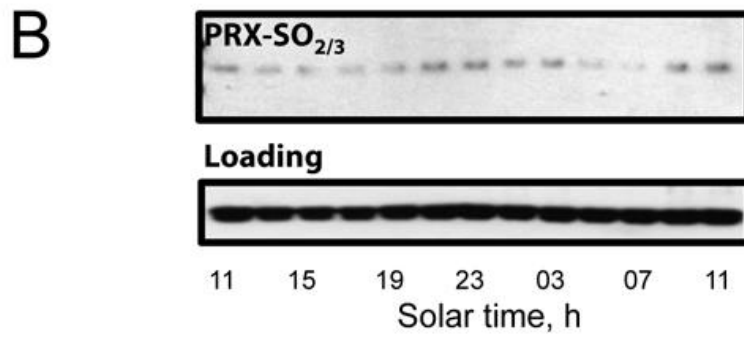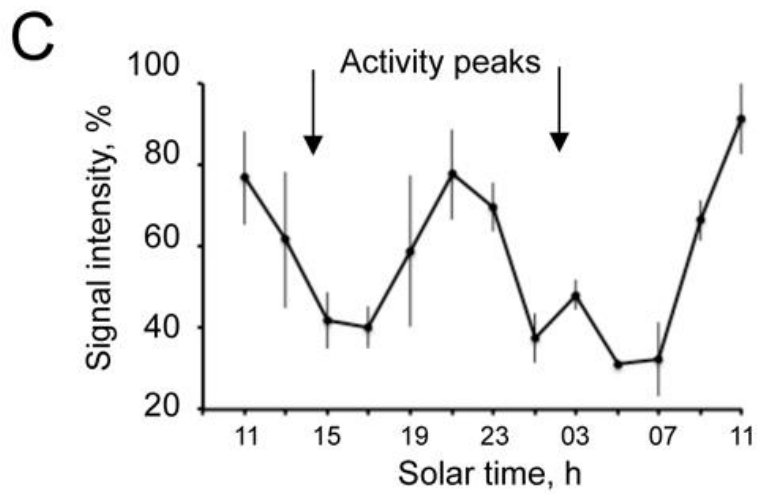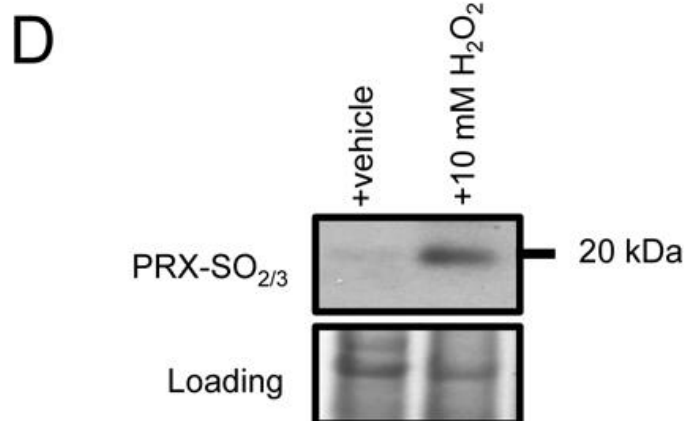

Supplement: mmc1.pdf [file mmc1.pdf]
